# Supplementary material
Source: PubMed Central journal article supplement (PMC7696650)
Supplement: NIHMS1648897-supplement-supplementary_information.pdf [file NIHMS1648897-supplement-supplementary_information.pdf]

# Mechanochemical Function of Myosin II: Investigation into the Recovery Stroke and ATP Hydrolysis

Anthony P. Baldo<sup>‡</sup>, Jil C. Tardiff<sup>¶</sup>, Steven D. Schwartz<sup>‡\*</sup>

<sup>‡</sup> Department of Chemistry and Biochemistry, University of Arizona, Tucson, AZ 85721, United States

<sup>¶</sup> Department of Biomedical Engineering, University of Arizona, Tucson, AZ 85724, United States

## Supplemental Information:

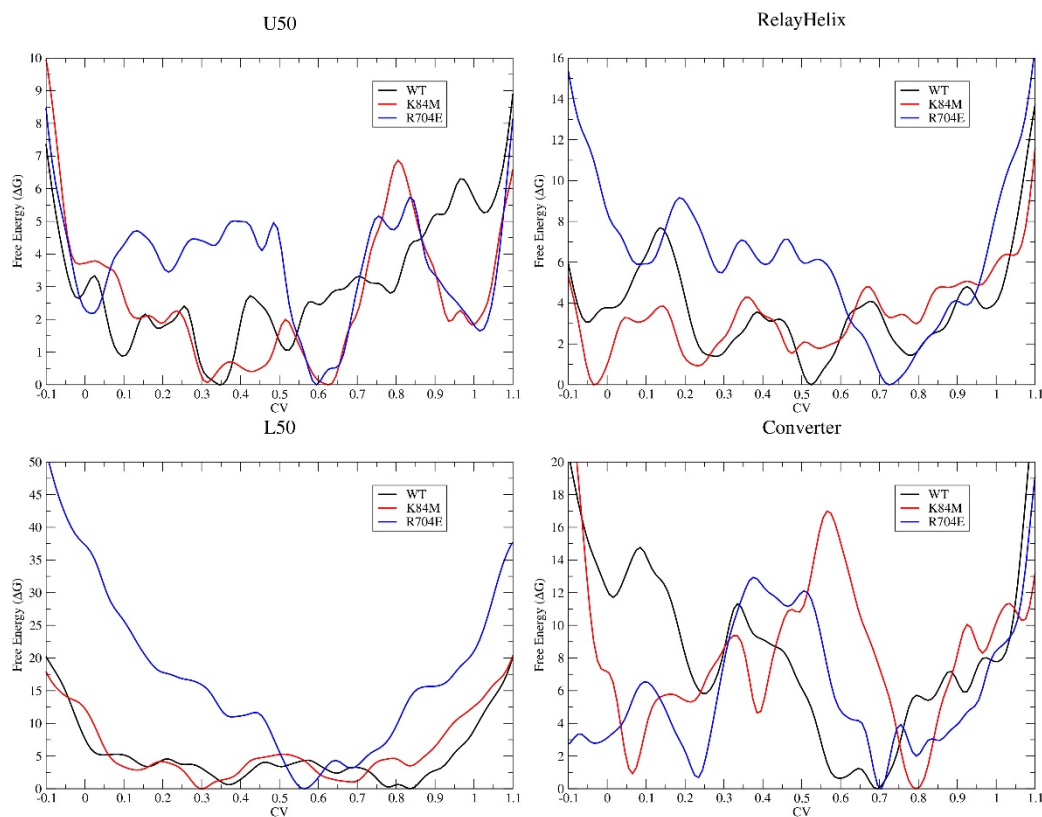

**Figure S1.** Covered FES profiles for the U50 (top left), relayhelix (top right), L50 (bottom left, and converter (bottom right) domains for the recovery stroke.

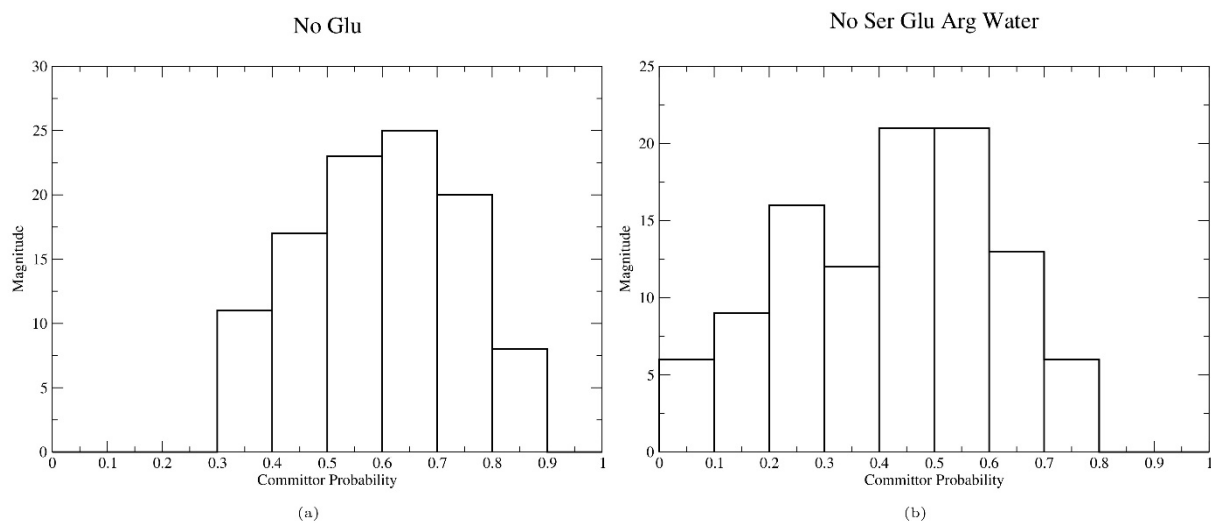

**Figure S2.** Committor distribution for a constrained QM region when a) Glu459 is unconstrained and b) Ser181, Glu459, Arg238, and a water are unconstrained.

## Bond Breaking - Bond Forming

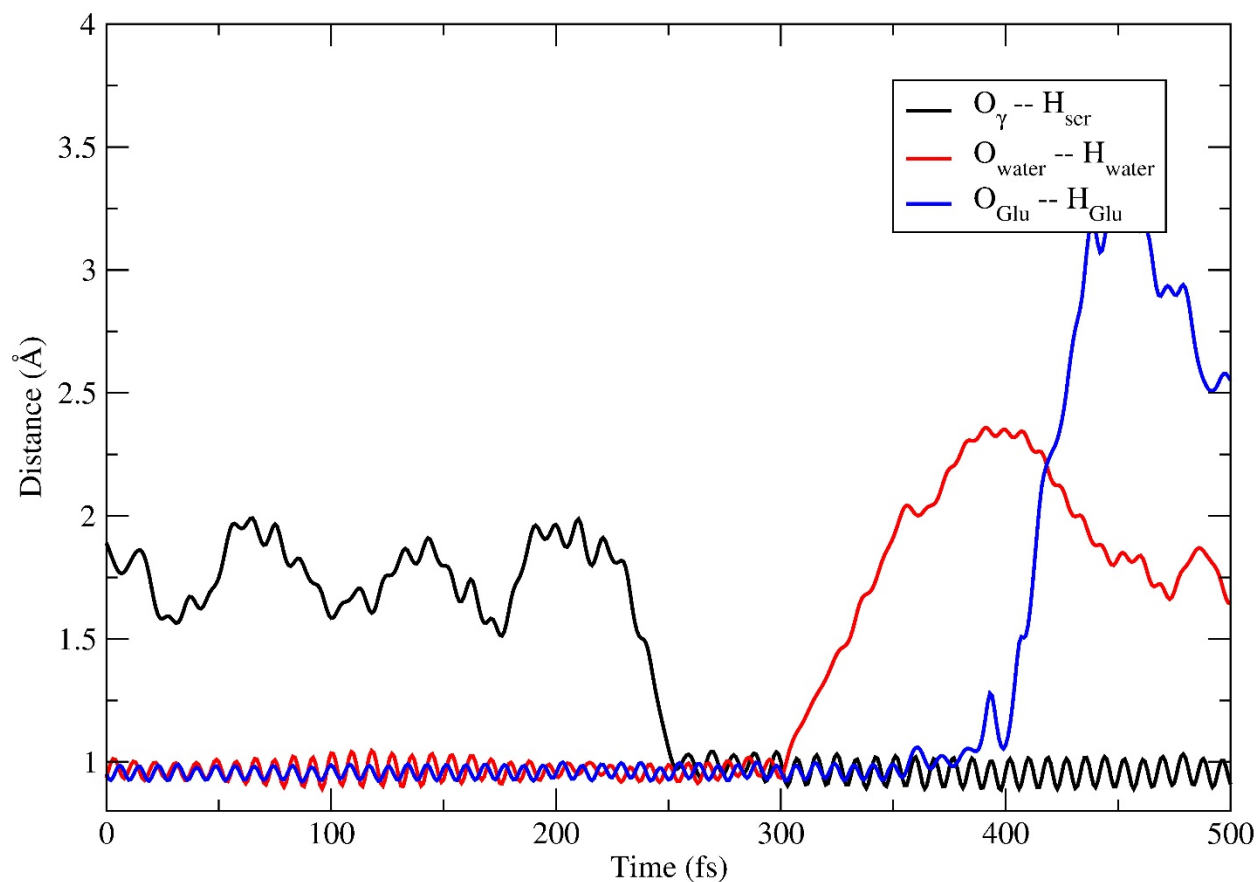

**Figure S3.** Mechanism for the formation of  $H_2PO_4$  from the Ser181 ensemble. The proton from Ser181 ( $H_{ser}$ ) transfers to an oxygen ( $O_{\gamma}$ ) of  $HPO_4$  and afterwards Ser181 abstracts the hydrogen from a nearby water ( $H_{water}$ ) and Glu459 is then deprotonated ( $H_{Glu}$ ) by the newly formed hydroxide.
